# Supplementary material for: Twenty-nine Cases of Enterovirus-D68–associated Acute Flaccid Myelitis in Europe 2016: A Case Series and Epidemiologic Overview
Source: PubMed Central journal article supplement — Pediatr Infect Dis J. 2018 Sep 18;38(1):16–21. doi: 10.1097/INF.0000000000002188 (PMC6296836; doi:10.1097/inf.0000000000002188), 2018-09-18
Supplement: inf-38-16-s001.pdf [file inf-38-16-s001.pdf]

## **The 2016 Enterovirus-D68 Acute Flaccid Myelitis Working Group**

**Stephan W. Aberle** (Medical University of Vienna, Vienna, Austria)

**Theresia Popow-Kraupp** (Medical University of Vienna, Vienna, Austria)

**Lubomira Nikolaeva-Glomb** (National Center of Infectious and Parasitic Diseases, Sofia, Bulgaria)

**Petra Rainetova** (National Reference Laboratory for Enteroviruses, Prague, Czech)

**Sofie Midgley** (Statens Serum Institute, Copenhagen, Denmark)

**Thea Kølsten Fischer** (Statens Serum Institute, Copenhagen and Center for Global Health, Department of Infectious Diseases, University of Southern Denmark, Odense, Denmark)

**Grethel Simonlatser** (Laboratory of Communicable Diseases, Tallinn, Estonia)

**Carita Savolainen-Kopra** (National Institute for Health and Welfare, Helsinki, Finland)

**Bruno Lina** (National Reference Centre for Enteroviruses and Parechoviruses, Hospices Civils de Lyon, Lyon, France)

**Isabelle Schuffenecker** (National Reference Centre for Enteroviruses and Parechoviruses, Hospices Civils de Lyon, Lyon, France)

**Manoëlle Kossorotoff** (Necker-Enfants Malades University Hospital, Paris, France)

**Denise Antona** (Santé publique France, Saint-Maurice, France)

**Anna Maria Eis-Hübinger** (University of Bonn Medical Center, Bonn, Germany)

**Stephan Buderus** (GFO Kliniken Bonn, St. Marien-Hospital, Bonn, Germany)

**Marcus Panning** (Institute for Virology, Medical Center – University of Freiburg, Faculty of Medicine, University of Freiburg, Freiburg, Germany)

**Markus Nowotny** (University Medical Center of the Johannes Gutenberg University, Mainz, Germany)

**Lisa Kiechle** (University Medical Center of the Johannes Gutenberg University, Mainz, Germany)

**Sindy Böttcher** (Robert Koch Institute, Berlin, Germany)

**Mária Takács** (National Public Health Institute, Budapest, Hungary)

**Ágnes Farkas** (National Public Health Institute, Budapest, Hungary)

**Arthur Löve** (National University Hospital Reykjavik, Reykjavik, Iceland)

**Fausto Baldanti** (University of Pavia, Pavia, Italy)

**Antonio Piralla** (Fondazione IRCCS Policlinico San Matteo, Pavia, Italy)

**Maria Rosaria Capobianchi** (Lazzaro Spallanzani National Institute for Infectious Diseases, Rome, Italy)

**Maria Beatrice Valli** (Lazzaro Spallanzani *National Institute for Infectious Diseases, Rome, Italy*)

**Susanna Esposito** (Pediatric Clinic, Università degli Studi di Perugia, Perugia, Italy)

**Elena Pariani** (University of Milan, Milan, Italy)

**Sandro Binda** (University of Milan, Milan, Italy)

**Rinze Neuteboom** (Erasmus Medical Center, Rotterdam, The Netherlands)

**Suzan Pas** (Erasmus Medical Center, Rotterdam, The Netherlands)

**Kimberley Benschop** (National Institute for Public Health and the Environment, Bilthoven, The Netherlands)

**Adam Meijer** (National Institute for Public Health and the Environment, Bilthoven, The Netherlands)

**Svein Arne Nordbø** (Department of Medical Microbiology, St. Olav's Hospital, Trondheim University Hospital and Department of Clinical and Molecular Medicine, Norwegian University of Science and Technology, Trondheim, Norway)

**Maria Hafstrøm** (Department of Pediatrics, St. Olav's Hospital, Trondheim University Hospital and Department of Clinical and Molecular Medicine, Norwegian University of Science and Technology, Trondheim, Norway)

**Susanne Gjeruldsen Dudman** (Norwegian Institute of Public Health, Oslo, Norway)

**Helle Pfeiffer** (Oslo University Hospital, Oslo, Norway)

**Raquel Guiomar** (National Influenza and Other Respiratory Viruses Reference Laboratory, National Institute of Health Dr Ricardo Jorge, Lisbon, Portugal)

**Paula Palminha** (Laboratory of Vaccine Preventable Diseases, National Institute of Health Dr Ricardo Jorge, Lisbon, Portugal)

**Inês Costa** (National Influenza and Other Respiratory Viruses Reference Laboratory, National Institute of Health Dr Ricardo Jorge, Lisbon, Portugal)

**Andrea Sofia Dias** (Coimbra Hospital and University Center, Coimbra, Portugal)

**Cristina Tecu** (National Institute for Medical-Military Research and Development  
"Cantacuzino", Bucharest, Romania)

**Carmen Maria Cherciu** (National Institute for Medical-Military Research and Development  
"Cantacuzino", Bucharest, Romania)

**Ivana Lazarevic** (Institute of Microbiology and Immunology, Faculty of Medicine,  
University of Belgrade, Belgrade, Serbia)

**Svetlana Filipović – Vignjević** (Institute of Virology, Vaccines and Sera "Torlak", Belgrade,  
Serbia)

**Natasa Berginc** (National Laboratory of Health, Environment and Food, Ljubljana, Slovenia)

**Mónica Gozalo Margüello** (Marqués de Valdecilla University Hospital, Santander, Spain)

**Maria Cabrerizo Sanz** (Spanish National Poliovirus Laboratory, National Centre for  
Microbiology, Institute of Health "Carlos III", Madrid, Spain)

**Juan Pablo García Iñiguez** (Pediatric Intensive Care Unit, Miguel Servet Children's  
Hospital, Zaragoza, Spain)

**Sonia Perez Castro** (University Hospital of Vigo and Inflammatory and Infectious Diseases  
& Immune Disorders Group, Galicia Sur Health Research Institute, Vigo, Spain)

**Carlos Rodrigo** (Vall d'Hebron University Hospital and Autonomous University of  
Barcelona, Barcelona, Spain)

**Andrés Antón** (Vall d'Hebron University Hospital, Barcelona, Spain)

**Núria Rabella Garcia** (Santa Creu i Sant Pau Hospital, Barcelona, Spain)

**Robert Dyrdak** (Karolinska Institutet and Karolinska University Hospital, Stockholm, Sweden)

**Jan Albert** (Karolinska Institutet and Karolinska University Hospital, Stockholm, Sweden)

**Rolf Kramer** (European Public Health Microbiology Training Programme (EUPHEM), European Centre for Disease Prevention and Control, Stockholm, Sweden)

**Sybil Stacpoole** (Cambridge University Hospitals NHS Foundation Trust, Cambridge, England, UK)

**Rhys Thomas** (Newcastle University, Newcastle, England, UK)

**Niamh O’Flaherty** (National Virus Reference Laboratory, University Center Dublin, Dublin, Ireland)

**Richard Drew** (Rotunda Hospital & Temple Street Children's University Hospital, Dublin, Ireland)

**Kate Templeton** (Royal Hospital for Sick Children, Edinburgh, Scotland, UK)

**Catherine McDougall** (Royal Hospital for Sick Children, Edinburgh, Scotland, UK)

**Paul Eunson** (Royal Hospital for Sick Children, Edinburgh, Scotland, UK)

**Nandita Chinchankar** (Royal Hospital for Sick Children, Edinburgh, Scotland, UK)

**Jay Shetty** (Royal Hospital for Sick Children, Edinburgh, Scotland, UK)

**Catherine Moore** (Public Health Wales, Cardiff, Wales, UK)

**Christopher Williams** (Public Health Wales, Cardiff, Wales, UK)

**Authors in byline, who accept direct responsibility for the manuscript:**

**Marjolein Knoester** (University Medical Center Groningen, Groningen, The Netherlands)

**Jelte Helfferich** (University Medical Center Groningen, Groningen, The Netherlands)

**Randy Poelman** (University Medical Center Groningen, Groningen, The Netherlands)

**Coretta van Leer-Buter** (University Medical Center Groningen, Groningen, The Netherlands)

**Oebele Brouwer** (University Medical Center Groningen, Groningen, The Netherlands)

**Bert Niesters** (University Medical Center Groningen, Groningen, The Netherlands)
