# Supplementary material for: Twenty-nine Cases of Enterovirus-D68–associated Acute Flaccid Myelitis in Europe 2016: A Case Series and Epidemiologic Overview
Source: PubMed Central journal article supplement — Pediatr Infect Dis J. 2018 Sep 18;38(1):16–21. doi: 10.1097/INF.0000000000002188 (PMC6296836; doi:10.1097/inf.0000000000002188), 2018-09-18
Supplement: inf-38-16-s002.pdf [file inf-38-16-s002.pdf]

**Table 1. Clinical description of 29 enterovirus-D68 related acute flaccid myelitis cases, Europe 2016.**

|                                                      | Patient 1            | Patient 2                                                   | Patient 3                                                                | Patient 4                   | Patient 5                                                   | Patient 6       | Patient 7 | Patient 8           | Patient 9       | Patient 10                                                                | Patient 11                              |                             |
|------------------------------------------------------|----------------------|-------------------------------------------------------------|--------------------------------------------------------------------------|-----------------------------|-------------------------------------------------------------|-----------------|-----------|---------------------|-----------------|---------------------------------------------------------------------------|-----------------------------------------|-----------------------------|
| Characteristics                                      |                      |                                                             |                                                                          |                             |                                                             |                 |           |                     |                 |                                                                           |                                         |                             |
| <b>Age group at onset (years)</b>                    | 5-9                  | 0-4                                                         | 5-9                                                                      | 0-4                         | 0-4                                                         | 0-4             | 5-9       | >20                 | 0-4             | 0-4                                                                       | 0-4                                     |                             |
| <b>Gender</b>                                        | F                    | M                                                           | M                                                                        | F                           | F                                                           | F               | F         | M                   | F               | M                                                                         | M                                       |                             |
| <b>Medical history</b>                               | Asthma               |                                                             |                                                                          |                             |                                                             |                 |           |                     |                 |                                                                           |                                         |                             |
| Clinical data                                        |                      |                                                             |                                                                          |                             |                                                             |                 |           |                     |                 |                                                                           |                                         |                             |
| <b>Prodrome</b>                                      | Resp/GI              | Resp/GI                                                     | Resp                                                                     | Resp                        | Resp                                                        | Resp            | Resp      | Resp                | Resp            | Resp                                                                      | Malaise                                 |                             |
| <b>Fever</b>                                         | Yes                  | Yes                                                         | Yes                                                                      | Yes                         | No                                                          | X               | X         | X                   | Yes             | Yes                                                                       | Yes                                     |                             |
| <b>No. days until onset of weakness</b>              | 2                    | 6                                                           | 6                                                                        | 2                           | 0                                                           | X               | X         | X                   | 2               | 2                                                                         | X                                       |                             |
| <b>Cranial nerves affected</b>                       | No                   | No                                                          | No                                                                       | No                          | No                                                          | Bulbar symptoms | Dysphagia | Diplopia, Dysphagia | Bulbar symptoms | Right facial nerve palsy                                                  | Facial droop, dysarthria, eye deviation |                             |
| <b>Ventilatory support</b>                           | Yes                  | No                                                          | No                                                                       | Yes                         | No                                                          | Yes             | Yes       | Yes                 | No              | Yes                                                                       | Yes                                     |                             |
| <b>Limb weakness</b>                                 |                      |                                                             |                                                                          |                             |                                                             |                 | Yes       |                     |                 |                                                                           |                                         |                             |
| <b>Arms affected</b>                                 | 2                    | 0                                                           | 1                                                                        | 1                           | 0                                                           | 2               | X         | 2                   | 2               | 2                                                                         | 2                                       |                             |
| <b>Legs affected</b>                                 | 2                    | 2                                                           | 0                                                                        | 0                           | 2                                                           | 2               | X         | 2                   | 0               | 2                                                                         | 0                                       |                             |
| <b>Reflexes decreased or absent</b>                  | Yes                  | Yes                                                         | Yes                                                                      | X                           | Yes                                                         | X               | X         | Yes                 | Yes             | Yes                                                                       | Yes                                     |                             |
| <b>Other symptoms</b>                                | Back pain            | Headache                                                    |                                                                          |                             | Neurogenic bladder dysfunction, dysesthesia legs, pneumonia |                 |           | Headache            |                 | Headache                                                                  | Generalized convulsions                 |                             |
| Investigations                                       |                      |                                                             |                                                                          |                             |                                                             |                 |           |                     |                 |                                                                           |                                         |                             |
| <b>CSF cell-count (leukocytes/<math>\mu</math>L)</b> | 141                  | 50                                                          | 169                                                                      | 89                          | 9                                                           | X               | X         | X                   | 90              | 3                                                                         | 27                                      |                             |
| <b>CSF protein level (g/L)</b>                       | 0,48                 | 0,49                                                        | X                                                                        | 0,48                        | 0,36                                                        | X               | X         | X                   | 0,21            | 0,35                                                                      | 0,3                                     |                             |
| <b>MRI: Hyperintensity central cord</b>              | Yes                  | No                                                          | Yes                                                                      | Yes                         | Yes                                                         | X               | X         | Yes                 | Yes             | Yes                                                                       | Yes                                     |                             |
| <b>Location (if specified)</b>                       | From C3 till conus   |                                                             | Cervical                                                                 | Cervical and thoracic spine | From T10 till L1                                            |                 |           |                     | From C1 till C7 |                                                                           | Cervical and thoracic spine             | Cervical and thoracic spine |
| <b>MRI brain: Hyperintensity dorsal pons/medulla</b> | No                   | No                                                          | Yes                                                                      | Yes                         | No                                                          | X               | X         | X                   | Yes             | Yes                                                                       | Yes                                     |                             |
| <b>Other MRI abnormalities</b>                       |                      |                                                             |                                                                          |                             |                                                             | Enhancing roots |           |                     |                 | Enhancing roots                                                           |                                         |                             |
| <b>EMG</b>                                           | Low motor amplitudes | Normal at onset; Reduced conduction velocities after 2 days | Low motor amplitudes and spontaneous muscle fiber activity after 2 weeks | X                           | Low motor amplitudes                                        | X               | X         | X                   | X               | Low motor amplitudes; positive sharp waves/fibrillations after two months | Low motor amplitudes                    |                             |
| Treatment                                            |                      |                                                             |                                                                          |                             |                                                             |                 |           |                     |                 |                                                                           |                                         |                             |
| <b>IVIG</b>                                          | Yes                  | Yes                                                         | Yes                                                                      | Yes                         | Yes                                                         | X               | X         | X                   | Yes             | Yes                                                                       | Yes                                     |                             |
| <b>Steroids</b>                                      | Yes                  | No                                                          | No                                                                       | Yes                         | Yes                                                         | X               | X         | X                   | Yes             | No                                                                        | Yes                                     |                             |
| <b>Other</b>                                         | Fluoxetine           |                                                             |                                                                          |                             |                                                             |                 |           |                     |                 |                                                                           | Plasmapheresis                          |                             |
| Outcome                                              |                      |                                                             |                                                                          |                             |                                                             |                 |           |                     |                 |                                                                           |                                         |                             |
| <b>Recovery</b>                                      | Partial              | Full                                                        | No                                                                       | Partial                     | Partial                                                     | No              | Partial   | Partial             | Partial         | Partial                                                                   | Partial                                 |                             |
| <b>Follow-up time (months)</b>                       | 4                    | 2                                                           | 2                                                                        | 4                           | 1                                                           | X               | X         | X                   | 5               | 12                                                                        | 11                                      |                             |
| Virology                                             |                      |                                                             |                                                                          |                             |                                                             |                 |           |                     |                 |                                                                           |                                         |                             |
| <b>EV-D68 positive in sample:</b>                    | Resp                 | Resp                                                        | Resp                                                                     | Feces                       | Resp                                                        | Resp            | Resp      | Resp                | Resp            | Resp                                                                      | Feces                                   |                             |
| Remarks                                              | Dec 2015             |                                                             |                                                                          |                             |                                                             |                 |           |                     |                 |                                                                           |                                         |                             |

Patient no. 11 and 18 were diagnosed in December 2015. Patient no. 25 had a co-infection with enterovirus A71.

Sixteen cases were previously reported in separate publications (references: 10, 11, 13, 20, 23, 24, 26, 30).

Abbreviations: CSF: cerebrospinal fluid, EMG: electromyography, F: female, GI: gastro-intestinal, IVIG: intravenous immunoglobulins, M: male, MRI: magnetic resonance imaging, Resp: respiratory, X: unknown

| Patient 12                                    | Patient 13                          | Patient 14          | Patient 15      | Patient 16                  | Patient 17                  | Patient 18 | Patient 19                                                                           | Patient 20                                                          | Patient 21                                               | Patient 22                    | Patient 23                | Patient 24                       | Patient 25   |
|-----------------------------------------------|-------------------------------------|---------------------|-----------------|-----------------------------|-----------------------------|------------|--------------------------------------------------------------------------------------|---------------------------------------------------------------------|----------------------------------------------------------|-------------------------------|---------------------------|----------------------------------|--------------|
| 0-4                                           | 0-4                                 | >20                 | 0-4             | 0-4                         | 0-4                         | 0-4        | >20                                                                                  | 0-4                                                                 | 5-9                                                      | 5-9                           | 0-4                       | 0-4                              | 0-4          |
| F                                             | M                                   | F                   | F               | F                           | M                           | M          | M                                                                                    | M                                                                   | F                                                        | M                             | F                         | M                                | F            |
| Possible asthma                               |                                     | Lymphoma            |                 |                             | Prematurity                 |            |                                                                                      | Mild Wheeze                                                         |                                                          |                               |                           |                                  |              |
| Resp/GI                                       | Resp                                | Fever               | Resp            | Resp                        | Resp                        | Resp/GI    | Resp                                                                                 | Resp/GI                                                             | Resp                                                     | Resp                          | Resp/GI                   | Resp/GI                          | Otitis/skin  |
| Yes                                           | Yes                                 | Yes                 | Yes             | Yes                         | Yes                         | Yes        | Yes                                                                                  | Yes                                                                 | Yes                                                      | Yes                           | Yes                       | Yes                              | Yes          |
| 3                                             | 2                                   | 2-3                 | 4               | 1                           | X                           | 2          | 2-14                                                                                 | 4                                                                   | 2                                                        | 7                             | 1                         | 1                                | 3            |
| Bulbar symptoms                               | Right facial nerve palsy, dysphagia | Bulbar symptoms     | No              | Facial and bulbar weakness  | X                           | Dysphagia  | Bilateral abducens palsy                                                             | Facial and bulbar weakness                                          | Facial and bulbar weakness                               | No                            | Facial and abducens palsy | No                               | No           |
| Yes                                           | Yes                                 | Yes                 | Yes             | Yes                         | No                          | Yes        | Yes                                                                                  | Yes                                                                 | Yes                                                      | No                            | No                        | No                               | No           |
| 2                                             | 2                                   | 2                   | 1               | 2                           | 2                           | 2          | 2                                                                                    | 2                                                                   | 2                                                        | 2                             | 2                         | 2                                | X            |
| 2                                             | 2                                   | 0                   | 1               | 2                           | 2                           | 2          | 2                                                                                    | 0                                                                   | 2                                                        | 2                             | 2                         | 2                                | 2            |
| Yes                                           | Yes                                 | X                   | Yes             | Yes                         | Yes                         | X          | Yes                                                                                  | Yes                                                                 | Yes                                                      | Yes                           | Yes                       | Yes                              | Increased    |
| Autonomic disturbance                         | Pneumonia                           |                     |                 |                             | Irritability                |            |                                                                                      | Pain, autonomic instability                                         | Pain, autonomic instability                              |                               | Feeding difficulties      |                                  | Ataxia, pain |
| 63                                            | 80                                  | 130                 | 175             | X                           | 142                         | Raised     | 28                                                                                   | 78                                                                  | X                                                        | X                             | X                         | 19                               | 38           |
| 1,6                                           | 0,76                                | 0,34                | 0,61            | X                           | X                           | Raised     | 0,38                                                                                 | 0,35                                                                | X                                                        | X                             | X                         | 0,27                             | 0,24         |
| Yes                                           | Yes                                 | Yes                 | Yes             | Yes                         | Yes                         | X          | Yes                                                                                  | Yes                                                                 | Yes                                                      | Not clear; movement artefacts | Yes                       | Yes                              | No           |
| Cervical spine                                | Cervical and thoracic spine         | Cervical spine      | From C2 till C7 | Cervical and thoracic spine | Cervical and thoracic spine |            | C2 till C7                                                                           | C2 till C5                                                          | C2 till C7                                               |                               | C2 till C7                | Entire spinal cord; Maximum T1-2 |              |
| Yes                                           | Yes                                 | No                  | No              | Yes                         | X                           | Yes        | No                                                                                   | Yes                                                                 | Yes                                                      | Yes                           | Yes                       | Yes                              | Yes          |
| Hyperintensity dentate nuclei, dorsal medulla | Enhancing roots                     |                     |                 |                             | Meningeal enhancement       |            |                                                                                      |                                                                     |                                                          |                               |                           |                                  |              |
| Low motor amplitudes                          | X                                   | X                   | X               | X                           | X                           | X          | Low motor amplitudes; frequent fibrillations and positive sharp waves after 3 months | Low motor amplitudes; frequent fibrillation potentials after 7 days | Low motor amplitudes; widespread fibrillation potentials | X                             | X                         | X                                | X            |
| Yes                                           | Yes                                 | No                  | X               | Yes                         | Yes                         | No         | Yes                                                                                  | Yes                                                                 | Yes                                                      | No                            | Yes                       | Yes                              | Yes          |
| Yes                                           | Yes                                 | Yes                 | X               | Yes                         | Yes                         | No         | Yes                                                                                  | Yes                                                                 | No                                                       | No                            | No                        | Yes                              | Yes          |
| Plasmapheresis                                | Plasmapheresis                      |                     |                 | Plasmapheresis              |                             |            |                                                                                      |                                                                     |                                                          |                               |                           |                                  |              |
| Partial                                       | Partial                             | Death after 14 days | Partial         | Partial                     | Partial                     | Partial    | Partial                                                                              | Partial                                                             | Partial                                                  | Almost full recovery          | Partial                   | Partial                          | Full         |
| 1                                             | 1                                   | 1                   | 0,5             | 5                           | 2                           | 7          | 12                                                                                   | 12                                                                  | 12                                                       | 12                            | 12                        | 12                               | 1            |
| Resp                                          | Resp                                | CSF/Resp            | Resp            | Resp/Feces                  | Resp/Feces                  | Resp/Feces | Resp                                                                                 | Resp                                                                | Resp                                                     | Resp                          | Resp                      | Resp                             | Resp/Feces   |
|                                               |                                     |                     |                 |                             |                             |            | Dec 2015                                                                             |                                                                     |                                                          |                               |                           |                                  | Also EV-A71  |

| Patient 26                                                 | Patient 27 | Patient 28                             | Patient 29                                                  |
|------------------------------------------------------------|------------|----------------------------------------|-------------------------------------------------------------|
| 0-4                                                        | 0-4        | 5-9                                    | 0-4                                                         |
| F                                                          | M          | M                                      | M                                                           |
| Resp                                                       | Resp       | No                                     | Resp                                                        |
| Yes                                                        | Yes        | No                                     | Yes                                                         |
| 1                                                          | X          | X                                      | 2                                                           |
| Strabismus, ptosis,<br>facial palsy, bulbar<br>dysfunction | No         | Bulbar weakness                        | No                                                          |
| Yes                                                        | No         | Yes                                    | Yes                                                         |
|                                                            | Yes        |                                        |                                                             |
| 2                                                          | X          | 2                                      | 1                                                           |
| 2                                                          | X          | 2                                      | 0                                                           |
| Yes                                                        | X          | No                                     | X                                                           |
| Pain, paresthesia                                          | Pneumonia  | Acute respiratory<br>distress syndrome | Severe pneumonia,<br>transient<br>myocardial<br>dysfunction |
| 416                                                        | <5         | Raised                                 | 369                                                         |
| 0,44                                                       | Normal     | X                                      | 0,59                                                        |
| Yes                                                        | Yes        | Yes                                    | Yes                                                         |
| Entire spinal cord                                         |            |                                        | C3 till C7                                                  |
| Yes                                                        | No         | Yes                                    | No                                                          |
| Caudal root<br>enhancement                                 |            |                                        |                                                             |
| Low motor<br>amplitudes                                    | X          | X                                      | X                                                           |
| Yes                                                        | No         | X                                      | Yes                                                         |
| Yes                                                        | Yes        | X                                      | Yes                                                         |
| Plasmapheresis,<br>Rituximab                               |            |                                        |                                                             |
| Death after 3<br>months                                    | X          | Partial                                | Partial                                                     |
| X                                                          | X          | 3                                      | 3                                                           |
| Resp/CSF/Feces                                             | Resp/Feces | Resp                                   | Resp                                                        |
