# Supplementary material for: Twenty-nine Cases of Enterovirus-D68–associated Acute Flaccid Myelitis in Europe 2016: A Case Series and Epidemiologic Overview
Source: PubMed Central journal article supplement — Pediatr Infect Dis J. 2018 Sep 18;38(1):16–21. doi: 10.1097/INF.0000000000002188 (PMC6296836; doi:10.1097/inf.0000000000002188), 2018-09-18
Supplement: inf-38-16-s004.pdf [file inf-38-16-s004.pdf]

**Supplemental Digital Content 4.** Results of enterovirus and enterovirus-D68 testing as reported by 16 European laboratories, from March to October 2016, for all materials (respiratory, CSF, feces and blood) and respiratory specimens separately.

| Country                       | <i>n</i> EV tests on ALL clinical samples (respiratory, CSF, feces, blood) |                 |                     |          |              | <i>n</i> EV tests ONLY on respiratory samples |                 |                     |          |              |
|-------------------------------|----------------------------------------------------------------------------|-----------------|---------------------|----------|--------------|-----------------------------------------------|-----------------|---------------------|----------|--------------|
| Diagnostic laboratories       | <i>n</i> EV tests                                                          | <i>n</i> EV POS | <i>n</i> EV-D68 POS | % EV POS | % EV-D68 POS | <i>n</i> EV tests                             | <i>n</i> EV POS | <i>n</i> EV-D68 POS | % EV POS | % EV-D68 POS |
| 1 Iceland                     | 610                                                                        | 8               | <b>8</b>            | 1%       | 100%         | 331                                           | 24              | <b>8</b>            | 7%       | 33%          |
| 2 Norway                      | 1236                                                                       | 240             | <b>146</b>          | 19%      | 61%          | 1090                                          | 221             | <b>146</b>          | 20%      | 66%          |
| 3 Netherlands                 | 2508                                                                       | 114             | <b>36</b>           | 5%       | 32%          | 1327                                          | 55              | <b>36</b>           | 4%       | 65%          |
| 4 Sweden                      | 4162                                                                       | 252             | <b>74</b>           | 6%       | 29%          | 2025                                          | 135             | <b>74</b>           | 7%       | 55%          |
| 5 Germany                     |                                                                            | 73              | <b>19</b>           |          | 26%          |                                               | 61              | <b>19</b>           |          | 31%          |
| 6 Germany                     | 790                                                                        | 52              | <b>11</b>           | 7%       | 21%          | 456                                           | 25              | <b>10</b>           | 5%       | 40%          |
| 7 Italy                       | 198                                                                        | 24              | <b>2</b>            | 12%      | 8%           | 12                                            | 4               | <b>1</b>            | 33%      | 25%          |
| 8 Austria                     | 1845                                                                       | 64              | <b>4</b>            | 3%       | 6%           | 561                                           | 11              | <b>4</b>            | 2%       | 36%          |
| 9 Austria                     | 1046                                                                       | 74              | <b>1</b>            | 7%       | 1%           | 125                                           | 7               | <b>1</b>            | 6%       | 14%          |
| 10 Spain                      | 160                                                                        | 37              | <b>0</b>            | 23%      | 0%           | 46                                            | 11              | <b>0</b>            | 24%      | 0%           |
| <b>Reference laboratories</b> |                                                                            |                 |                     |          |              |                                               |                 |                     |          |              |
| 11a Netherlands               | 458                                                                        | 11              | <b>8</b>            | 2%       | 73%          | 458                                           | 11              | <b>8</b>            | 2%       | 73%          |
| 11b Netherlands               | 297                                                                        | 211             | <b>26</b>           | 71%      | 12%          | 94                                            | 54              | <b>26</b>           | 57%      | 48%          |
| 12 Slovenia                   | 1058                                                                       | 100             | <b>24</b>           | 9%       | 24%          | 1054                                          | 99              | <b>24</b>           | 9%       | 24%          |
| 13 Wales                      | 3570                                                                       | 312             | <b>52</b>           | 9%       | 17%          | 1819                                          | 153             | <b>52</b>           | 8%       | 34%          |
| 14 Denmark                    |                                                                            | 197             | <b>4</b>            |          | 2%           |                                               | 19              | <b>4</b>            |          | 21%          |
| 15 Hungary                    | 297                                                                        | 44              | <b>0</b>            | 15%      | 0%           | 58                                            | 10              | <b>0</b>            | 17%      | 0%           |
| 16 Ireland                    | 3640                                                                       | 568             | <b>1</b>            | 14%      | <1%          | 770                                           | 167             | <b>1</b>            | 22%      | 1%           |
| <b>Total</b>                  | <b>21875</b>                                                               | <b>2381</b>     | <b>416</b>          |          | <b>17%</b>   | <b>10226</b>                                  | <b>1067</b>     | <b>414</b>          |          | <b>39%</b>   |

1. National University Hospital Reykjavik, 2. Trondheim University Hospital/Norwegian University of Science and Technology, 3. University Medical Center Groningen, 4. Karolinska

Institutet/Karolinska University Hospital, 5. Medical Center – University of Freiburg, 6. University of Bonn Medical Center, 7. National Institute for Infectious Diseases, 8. Medical University

of Vienna, 9. Medical University of Vienna, regional hospitals, 10. Marqués de Valdecilla University Hospital Santander, 11. National Institute for Public Health and the Environment (a.

surveillance of respiratory tract infections in general practice; b. enterovirus surveillance for polio eradication), 12. National Laboratory of Health, Environment and Food, 13. Public Health

Wales, 14. Statens Serum Institute, 15. National Public Health Institute, 16. University Center Dublin, National Virus Reference Laboratory
