# Supplementary figures and images for: Twenty-nine Cases of Enterovirus-D68–associated Acute Flaccid Myelitis in Europe 2016: A Case Series and Epidemiologic Overview
Source: PubMed Central journal article supplement — Pediatr Infect Dis J. 2018 Sep 18;38(1):16–21. doi: 10.1097/INF.0000000000002188 (PMC6296836; doi:10.1097/inf.0000000000002188), 2018-09-18

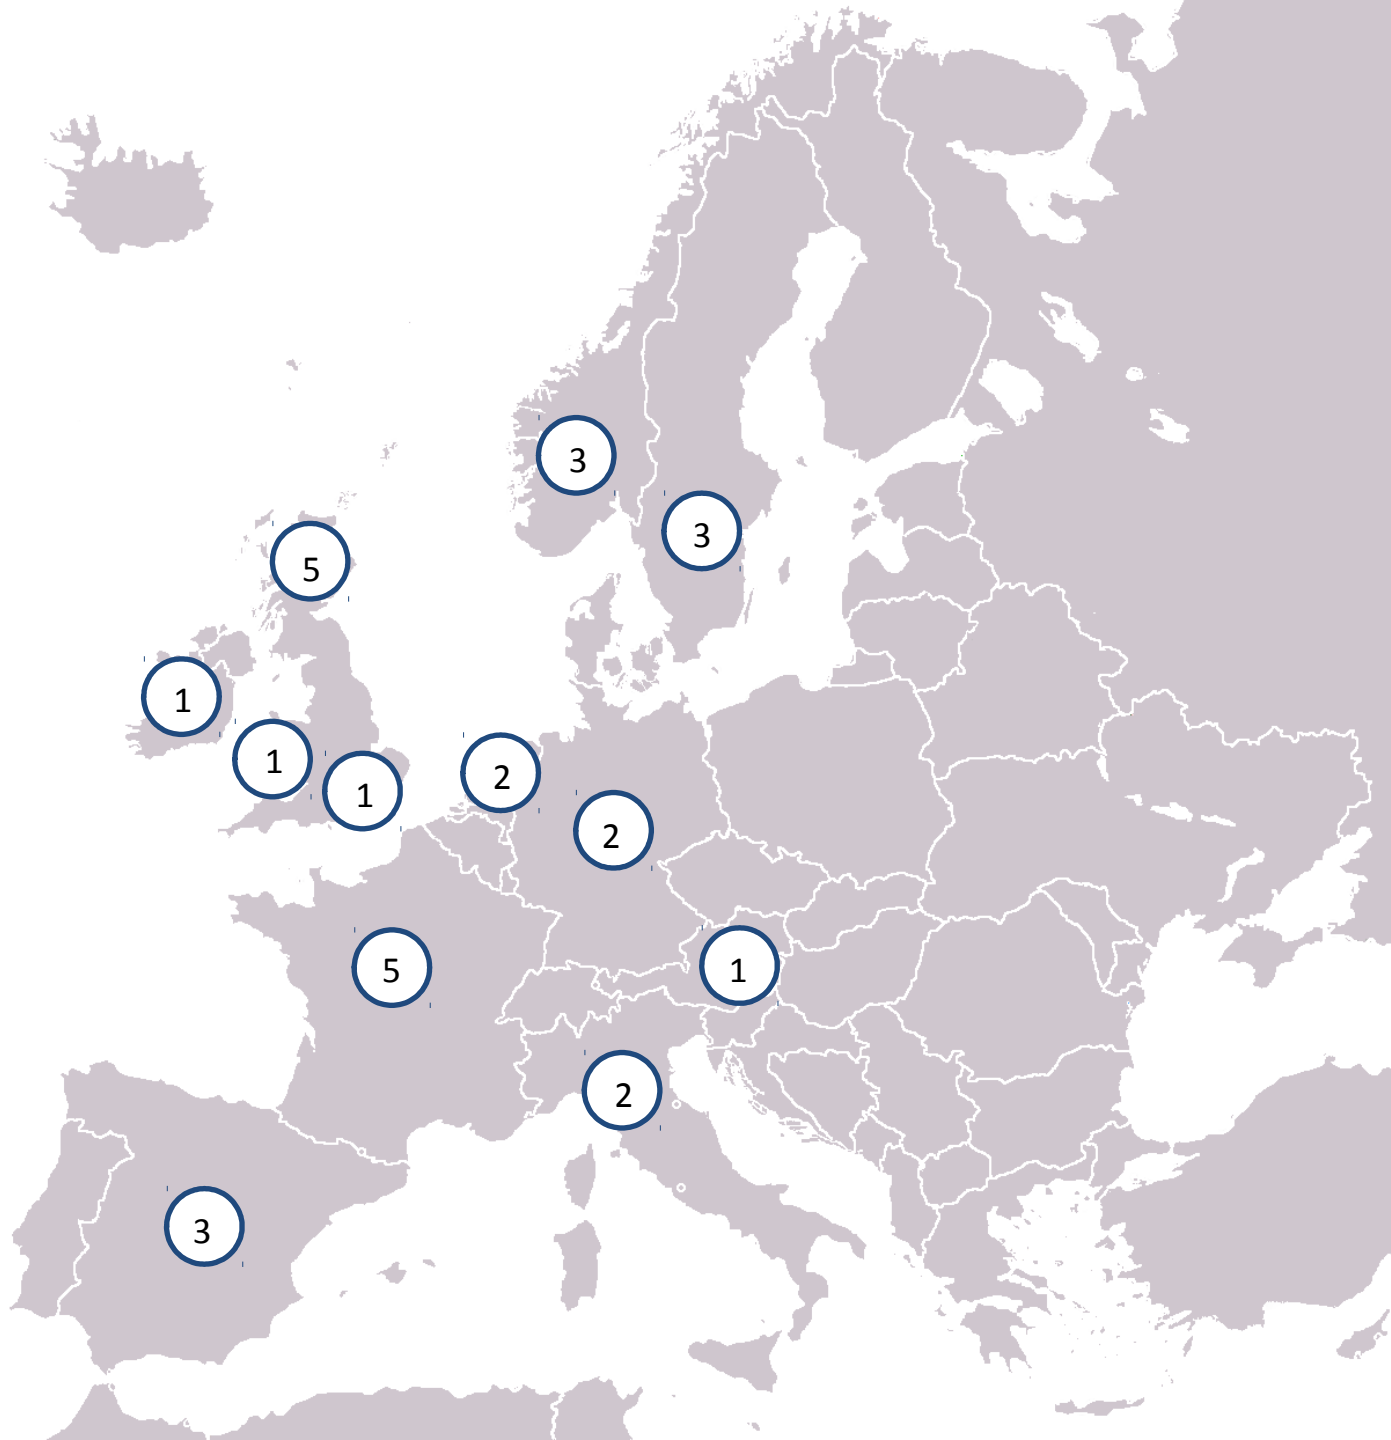

Supplement: inf-38-16-s003.pdf [file inf-38-16-s003.pdf]

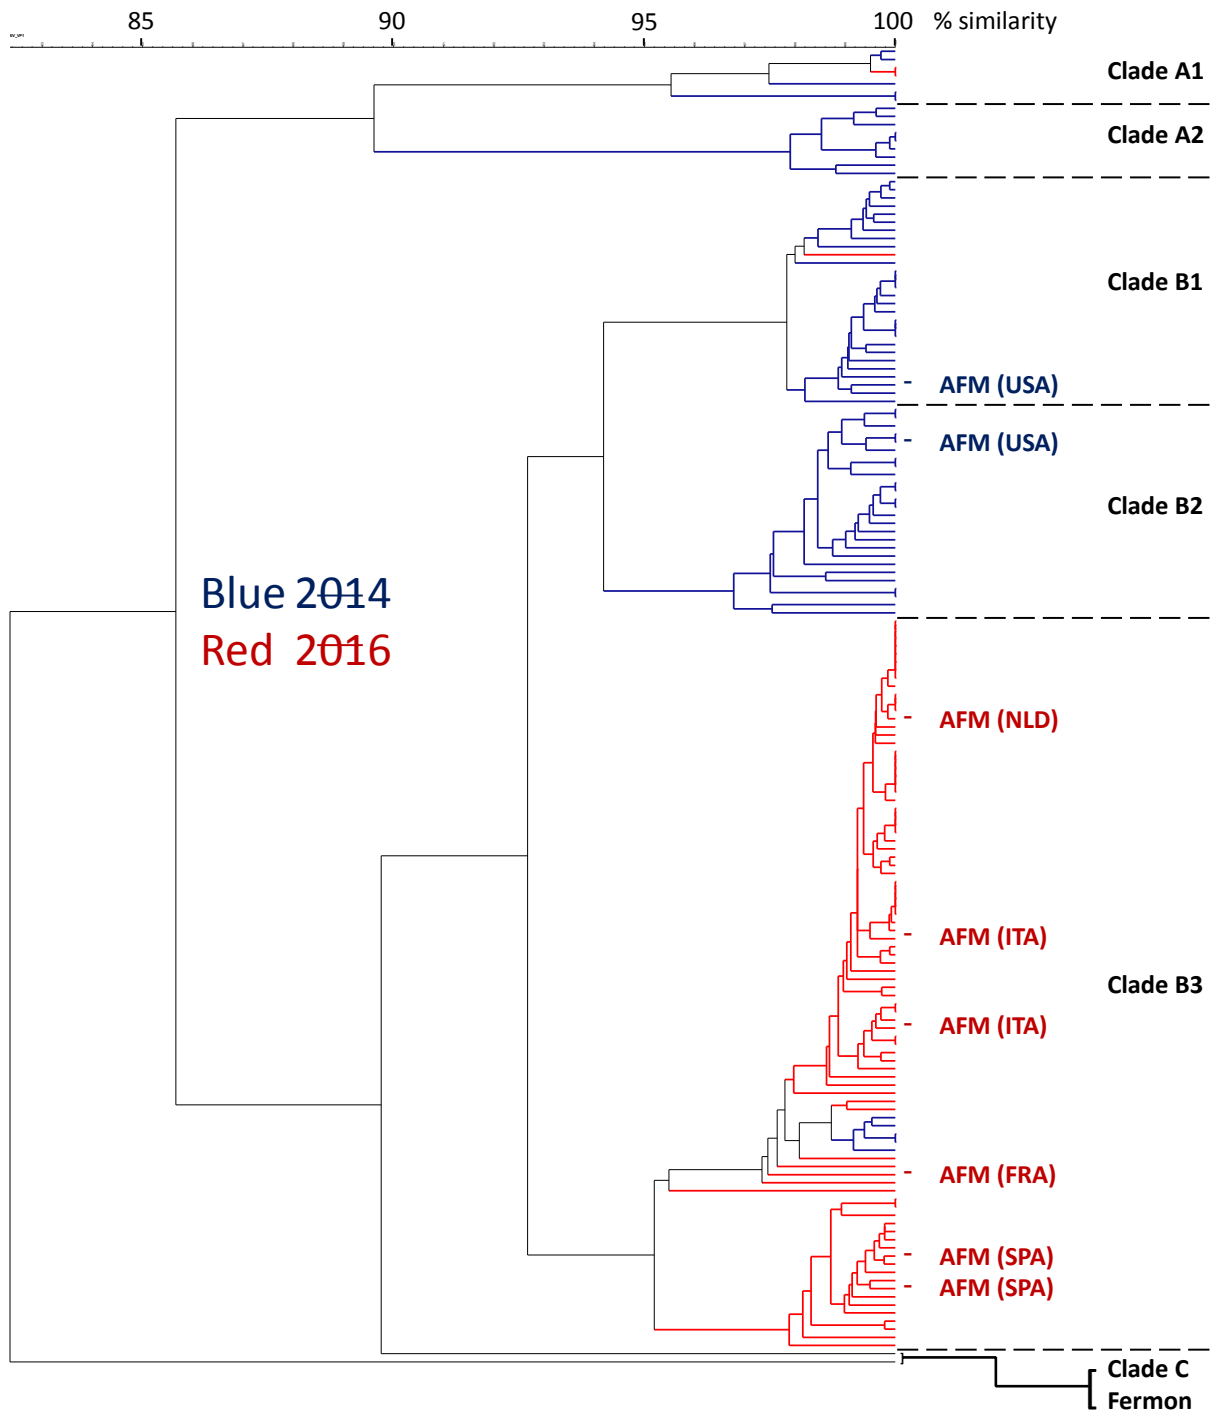

Supplement: inf-38-16-s005.pdf [file inf-38-16-s005.pdf]
